# Supplementary material for: Ni0.31Co0.69S2nanoparticles uniformly anchored on a porous reduced graphene oxide framework for a high-performance non-enzymatic glucose sensor
Source: Royal Society of Chemistry journal article supplement (doi:10.1039/c4ta06553k), 2015-01-01
Supplement: c4ta06553k1.pdf [file c4ta06553k1.pdf]

## Supporting Information

# $\text{Ni}_{0.31}\text{Co}_{0.69}\text{S}_2$ Nanoparticles Uniformly Anchored on the Porous Reduced Graphene Oxide Framework for High Performance Non-enzymatic Glucose Sensor

Guilin Li, Huanhuan Huo, Cailing Xu\*

Received (in XXX, XXX) Xth XXXXXXXXXX 200X, Accepted Xth XXXXXXXXXX 200X

DOI: 10.1039/b000000x

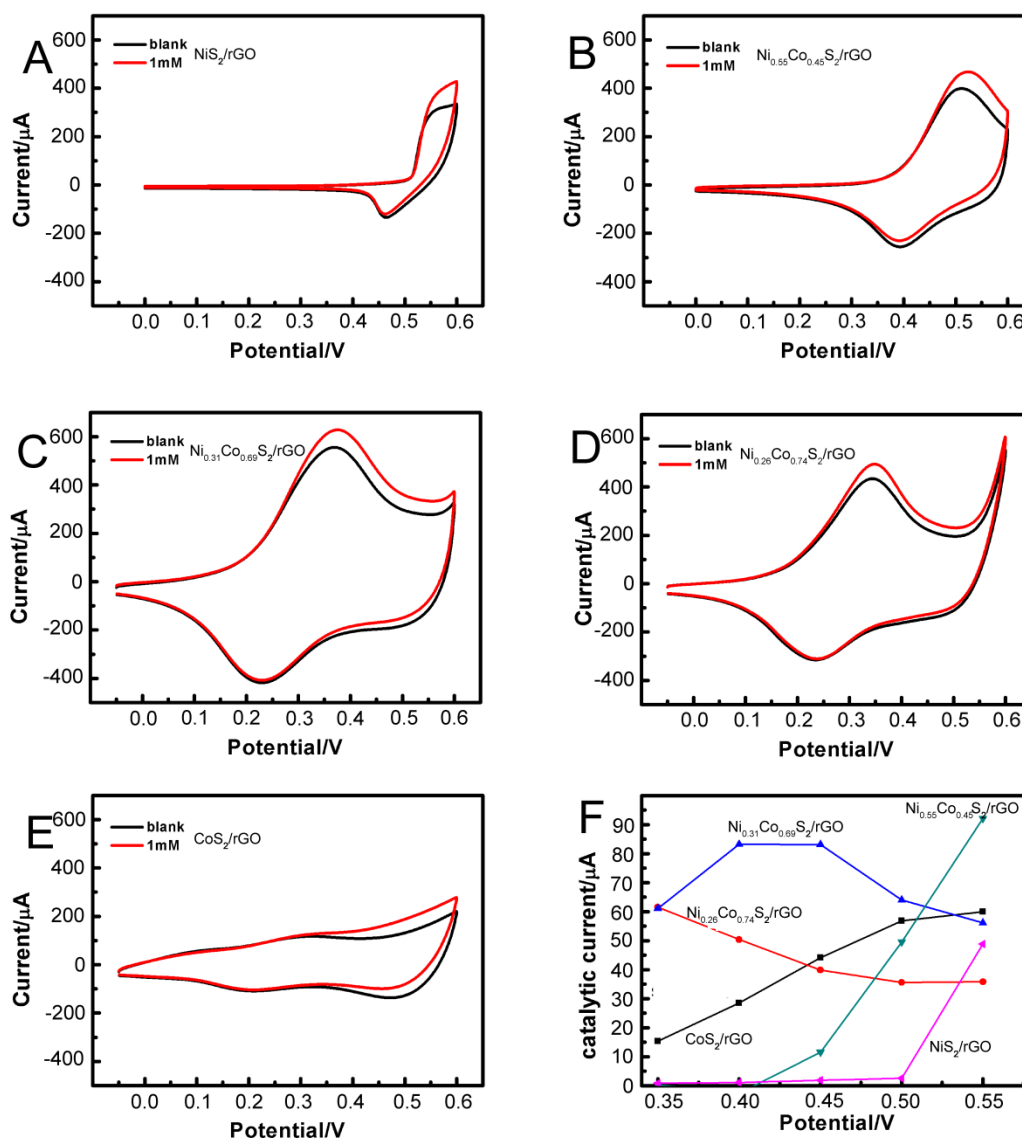

Fig.S1 CVs of the different modified electrodes at 20 mV/s in the absence and present of 1 mM glucose: (A) NiS<sub>2</sub>/rGO, (B) Ni<sub>0.55</sub>Co<sub>0.45</sub>S<sub>2</sub>/rGO, (C) Ni<sub>0.31</sub>Co<sub>0.69</sub>S<sub>2</sub>/rGO, (D) Ni<sub>0.26</sub>Co<sub>0.74</sub>S<sub>2</sub>/rGO and (E) CoS<sub>2</sub>/rGO. (F) The corresponding catalytic current of different modified electrodes at different potentials.

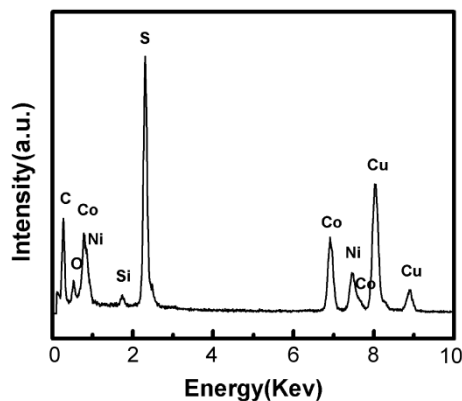

Fig.S2 EDS pattern of the as-prepared Ni<sub>0.31</sub>Co<sub>0.69</sub>S<sub>2</sub>/rGO sample-c.

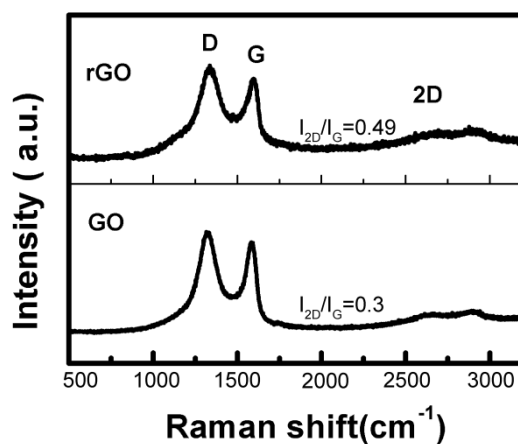

Fig. S3 Raman spectra of the GO and rGO samples.

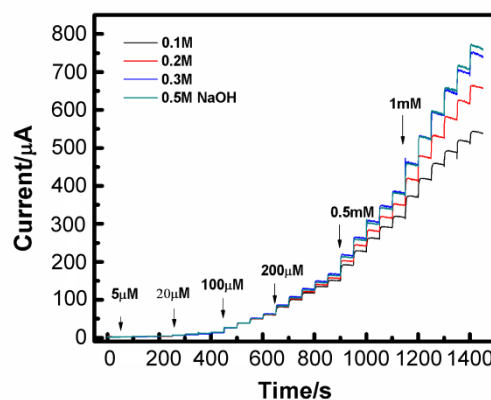

Fig.S4 Amperometric responses of the Ni<sub>0.31</sub>Co<sub>0.69</sub>S<sub>2</sub>/rGO modified electrode in different concentration of (0.1, 0.2, 0.3 and 0.5) NaOH solution to successive additions of different concentration glucose solution from 5 μM to 10 mM.

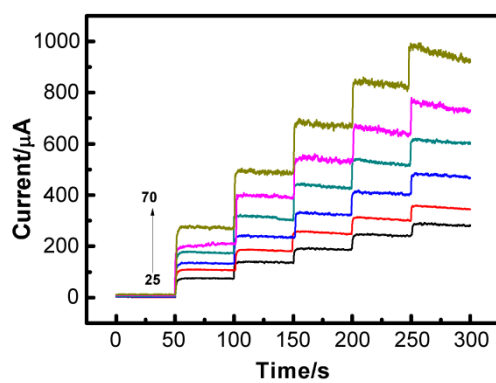

Fig.S5 Amperometric responses of the Ni<sub>0.31</sub>Co<sub>0.69</sub>S<sub>2</sub>/rGO modified electrode at different temperature (25, 30, 40, 50, 60 and 70 °C) to successive additions of 0.5mM glucose.
